# Supplementary material
Source: PubMed Central journal article supplement (PMC4816468)
Supplement: 10.3163.1536-5050.104.2.010.sg001.pdf [file 10.3163.1536-5050.104.2.010.sg001.pdf]

## New journals for publishing medical case reports

Katherine G. Akers, PhD

**Table 1**  
Case report journals

| Journal title                                                   | Publisher/Society                                                    | Year launched | Open access | Questionable publishing practices | PubMed indexed |
|-----------------------------------------------------------------|----------------------------------------------------------------------|---------------|-------------|-----------------------------------|----------------|
| <a href="#">A&amp;A Case Reports</a>                            | Wolters Kluwer Health/International Anesthesia Research Society      | 2013          | No          | No                                | No             |
| <a href="#">AACCE Clinical Case Reports</a>                     | American Association of Clinical Endocrinologists                    | 2015          | Yes         | No                                | No             |
| <a href="#">ACG Case Reports Journal</a>                        | American College of Gastroenterology                                 | 2013          | Yes         | No                                | Yes            |
| <a href="#">AJP Reports</a>                                     | Thieme Medical Publishers                                            | 2011          | Yes         | No                                | No             |
| <a href="#">American Journal of Cancer Case Reports</a>         | Ivy Union Publishing                                                 | 2013          | Yes         | Yes                               | No             |
| <a href="#">American Journal of Case Reports</a>                | International Scientific Information                                 | 2001          | Yes         | No                                | Yes            |
| <a href="#">American Journal of Medical Case Reports</a>        | Science and Education Publishing                                     | 2013          | Yes         | Yes                               | No             |
| <a href="#">Aperito Journal of Case Reports: Clinical</a>       | Aperito Online Publishing                                            | 2015          | Yes         | Yes                               | No             |
| <a href="#">APSP Journal of Case Reports</a>                    | EL-MED-Pub Publishers/Association of Paediatric Surgeons of Pakistan | 2010          | Yes         | No                                | Yes            |
| <a href="#">Austin Cardio &amp; Cardiovascular Case Reports</a> | Austin Publishing Group                                              | 2015          | Yes         | Yes                               | No             |
| <a href="#">Austin Gynecology Case Reports</a>                  | Austin Publishing Group                                              | 2015          | Yes         | Yes                               | No             |
| <a href="#">Austin Journal of Clinical Case Reports</a>         | Austin Publishing Group                                              | 2014          | Yes         | Yes                               | No             |
| <a href="#">Austin Oncology Case Reports</a>                    | Austin Publishing Group                                              | 2015          | Yes         | Yes                               | No             |
| <a href="#">Autopsy and Case Reports</a>                        | Hospital Universitario of the University of San Paulo                | 2011          | Yes         | No                                | No             |
| <a href="#">BJR Case Reports</a>                                | British Institute of Radiology                                       | 2015          | Yes         | No                                | No             |
| <a href="#">BMJ Case Reports</a>                                | BMJ Publishing Group                                                 | 2008          | No          | No                                | Yes            |
| <a href="#">Case Reports in Anesthesiology</a>                  | Hindawi Publishing                                                   | 2011          | Yes         | No                                | Yes            |
| <a href="#">Case Reports in Cardiology</a>                      | Hindawi Publishing                                                   | 2011          | Yes         | No                                | Yes            |
| <a href="#">Case Reports in Clinical Medicine</a>               | Scientific Research Publishing                                       | 2012          | Yes         | Yes                               | No             |
| <a href="#">Case Reports in Clinical Pathology</a>              | Sciedu Press                                                         | 2014          | Yes         | Yes                               | No             |

| <b>Journal title</b>                                      | <b>Publisher/Society</b>         | <b>Year launched</b> | <b>Open access</b> | <b>Questionable publishing practices</b> | <b>PubMed indexed</b> |
|-----------------------------------------------------------|----------------------------------|----------------------|--------------------|------------------------------------------|-----------------------|
| <a href="#">Case Reports in Critical Care</a>             | Hindawi Publishing               | 2011                 | Yes                | No                                       | Yes                   |
| <a href="#">Case Reports in Dermatological Medicine</a>   | Hindawi Publishing               | 2011                 | Yes                | No                                       | Yes                   |
| <a href="#">Case Reports in Dermatology</a>               | Karger                           | 2009                 | Yes                | No                                       | Yes                   |
| <a href="#">Case Reports in Emergency Medicine</a>        | Hindawi Publishing               | 2011                 | Yes                | No                                       | Yes                   |
| <a href="#">Case Reports in Endocrinology</a>             | Hindawi Publishing               | 2011                 | Yes                | No                                       | Yes                   |
| <a href="#">Case Reports in Gastroenterology</a>          | Karger                           | 2007                 | Yes                | No                                       | Yes                   |
| <a href="#">Case Reports in Gastrointestinal Medicine</a> | Hindawi Publishing               | 2011                 | Yes                | No                                       | Yes                   |
| <a href="#">Case Reports in Genetics</a>                  | Hindawi Publishing               | 2011                 | Yes                | No                                       | Yes                   |
| <a href="#">Case Reports in Hematology</a>                | Hindawi Publishing               | 2011                 | Yes                | No                                       | Yes                   |
| <a href="#">Case Reports in Hepatology</a>                | Hindawi Publishing               | 2011                 | Yes                | No                                       | Yes                   |
| <a href="#">Case Reports in Immunology</a>                | Hindawi Publishing               | 2011                 | Yes                | No                                       | Yes                   |
| <a href="#">Case Reports in Infectious Diseases</a>       | Hindawi Publishing               | 2011                 | Yes                | No                                       | Yes                   |
| <a href="#">Case Reports in Internal Medicine</a>         | Sciedu Press                     | 2014                 | Yes                | Yes                                      | No                    |
| <a href="#">Case Reports in Medicine</a>                  | Hindawi Publishing               | 2009                 | Yes                | No                                       | Yes                   |
| <a href="#">Case Reports in Nephrology</a>                | Hindawi Publishing               | 2011                 | Yes                | No                                       | Yes                   |
| <a href="#">Case Reports in Nephrology and Dialysis</a>   | Karger                           | 2011                 | Yes                | No                                       | Yes                   |
| <a href="#">Case Reports in Neurological Medicine</a>     | Hindawi Publishing               | 2011                 | Yes                | No                                       | Yes                   |
| <a href="#">Case Reports in Neurology</a>                 | Karger                           | 2009                 | Yes                | No                                       | Yes                   |
| <a href="#">Case Reports in Obstetrics and Gynecology</a> | Hindawi Publishing               | 2011                 | Yes                | No                                       | Yes                   |
| <a href="#">Case Reports in Oncological Medicine</a>      | Hindawi Publishing               | 2011                 | Yes                | No                                       | Yes                   |
| <a href="#">Case Reports in Oncology</a>                  | Karger                           | 2008                 | Yes                | No                                       | Yes                   |
| <a href="#">Case Reports in Ophthalmological Medicine</a> | Hindawi Publishing               | 2011                 | Yes                | No                                       | Yes                   |
| <a href="#">Case Reports in Ophthalmology</a>             | Karger                           | 2010                 | Yes                | No                                       | Yes                   |
| <a href="#">Case Reports in Orthopedics</a>               | Hindawi Publishing               | 2011                 | Yes                | No                                       | Yes                   |
| <a href="#">Case Reports in Otolaryngology</a>            | Hindawi Publishing               | 2011                 | Yes                | No                                       | Yes                   |
| <a href="#">Case Reports in Pancreatic Cancer</a>         | Mary Ann Liebert Inc. Publishing | 2015                 | Yes                | No                                       | No                    |
| <a href="#">Case Reports in Pathology</a>                 | Hindawi Publishing               | 2011                 | Yes                | No                                       | Yes                   |
| <a href="#">Case Reports in Pediatrics</a>                | Hindawi Publishing               | 2011                 | Yes                | No                                       | Yes                   |
| <a href="#">Case Reports in Perinatal Medicine</a>        | De Gruyter                       | 2012                 | Optional           | No                                       | No                    |

| Journal title                                                         | Publisher/Society                                                        | Year launched | Open access | Questionable publishing practices | PubMed indexed |
|-----------------------------------------------------------------------|--------------------------------------------------------------------------|---------------|-------------|-----------------------------------|----------------|
| <a href="#">Case Reports in Plastic Surgery and Hand Surgery</a>      | Taylor & Francis/Acta Chirurgica Scandinavica Society                    | 2014          | Yes         | No                                | No             |
| <a href="#">Case Reports in Psychiatry</a>                            | Hindawi Publishing                                                       | 2011          | Yes         | No                                | Yes            |
| <a href="#">Case Reports in Pulmonology</a>                           | Hindawi Publishing                                                       | 2011          | Yes         | No                                | Yes            |
| <a href="#">Case Reports in Radiology</a>                             | Hindawi Publishing                                                       | 2011          | Yes         | No                                | Yes            |
| <a href="#">Case Reports in Rheumatology</a>                          | Hindawi Publishing                                                       | 2011          | Yes         | No                                | Yes            |
| <a href="#">Case Reports in Surgery</a>                               | Hindawi Publishing                                                       | 2011          | Yes         | No                                | Yes            |
| <a href="#">Case Reports in Transplantation</a>                       | Hindawi Publishing                                                       | 2011          | Yes         | No                                | Yes            |
| <a href="#">Case Reports in Urology</a>                               | Hindawi Publishing                                                       | 2011          | Yes         | No                                | Yes            |
| <a href="#">Case Reports in Vascular Medicine</a>                     | Hindawi Publishing                                                       | 2011          | Yes         | No                                | Yes            |
| <a href="#">Case Reports in Women's Health</a>                        | Elsevier                                                                 | 2014          | Yes         | No                                | No             |
| <a href="#">Case Reports International</a>                            | Edorium Journals                                                         | 2012          | Yes         | No                                | No             |
| <a href="#">Case Reports: Open Access</a>                             | Jscholar                                                                 | 2015          | Yes         | Yes                               | No             |
| <a href="#">Case Study and Case Report</a>                            | Sageya Publishing                                                        | 2011          | Yes         | Yes                               | No             |
| <a href="#">CEN Case Reports</a>                                      | Springer/Japanese Society of Nephrology                                  | 2012          | Optional    | No                                | No             |
| <a href="#">Clinical Case Reports</a>                                 | Wiley                                                                    | 2013          | Yes         | No                                | Yes            |
| <a href="#">Clinical Case Reports and Reviews</a>                     | Open Access Text                                                         | 2015          | Yes         | Yes                               | No             |
| <a href="#">Clinical Cases in Mineral and Bone Metabolism</a>         | CIC Edizioni Internazionali/Italian Society of Orthopaedics and Medicine | 2004          | Yes         | No                                | Yes            |
| <a href="#">Clinical Medicine Insights: Case Reports</a>              | Libertas Academia                                                        | 2008          | Yes         | No                                | Yes            |
| <a href="#">Clinics and Practice</a>                                  | PAGEPress                                                                | 2011          | Yes         | No                                | Yes            |
| <a href="#">Cold Spring Harbor Molecular Case Studies</a>             | Cold Spring Harbor Laboratory Press                                      | 2015          | Yes         | No                                | No             |
| <a href="#">Dermatology Case Reports</a>                              | OMICS International                                                      | 2015          | Yes         | Yes                               | No             |
| <a href="#">Diabetes Case Reports</a>                                 | OMICS International                                                      | 2015          | Yes         | Yes                               | No             |
| <a href="#">Endocrinology, Diabetes &amp; Metabolism Case Reports</a> | Bioscientifica                                                           | 2013          | Yes         | No                                | Yes            |
| <a href="#">Epilepsy &amp; Behavior Case Reports</a>                  | Elsevier                                                                 | 2013          | Yes         | No                                | Yes            |
| <a href="#">European Journal of Case Reports in Internal Medicine</a> | European Federation of Internal Medicine                                 | 2014          | Yes         | No                                | No             |
| <a href="#">European Journal of Pediatric Surgery Reports</a>         | Thieme Medical Publishers                                                | 2013          | Yes         | No                                | Yes            |

| <b>Journal title</b>                                                                           | <b>Publisher/Society</b>                                                                                                      | <b>Year launched</b> | <b>Open access</b> | <b>Questionable publishing practices</b> | <b>PubMed indexed</b> |
|------------------------------------------------------------------------------------------------|-------------------------------------------------------------------------------------------------------------------------------|----------------------|--------------------|------------------------------------------|-----------------------|
| <a href="#"><u>European Journal of Surgical Cases</u></a>                                      | Bilimsef Tip Yayınevi                                                                                                         | 2010                 | Yes                | Yes                                      | No                    |
| <a href="#"><u>Experimental and Clinical Endocrinology &amp; Diabetes Reports</u></a>          | Thieme Medical Publishers                                                                                                     | 2014                 | Yes                | No                                       | No                    |
| <a href="#"><u>Global Journal of Medical and Clinical Case Reports</u></a>                     | PeerTechz                                                                                                                     | 2014                 | Yes                | Yes                                      | No                    |
| <a href="#"><u>Grand Rounds</u></a>                                                            | e-MED                                                                                                                         | 2001                 | Yes                | No                                       | No                    |
| <a href="#"><u>Gynecologic Oncology Reports</u></a>                                            | Elsevier                                                                                                                      | 2011                 | Yes                | No                                       | Yes                   |
| <a href="#"><u>HeartRhythm Case Reports</u></a>                                                | Elsevier/Heart Rhythm Society                                                                                                 | 2015                 | Yes                | No                                       | No                    |
| <a href="#"><u>Human Pathology: Case Reports</u></a>                                           | Elsevier                                                                                                                      | 2014                 | Yes                | No                                       | No                    |
| <a href="#"><u>IDCases</u></a>                                                                 | Elsevier                                                                                                                      | 2014                 | Yes                | No                                       | No                    |
| <a href="#"><u>IJSS Case Reports &amp; Reviews</u></a>                                         | IJSS Group of Journals/Society of Malaysian Medical Association's Medical Students and European Medical Student's Association | 2014                 | Yes                | No                                       | No                    |
| <a href="#"><u>Indian Journal of Medical Case Reports</u></a>                                  | CIBTech                                                                                                                       | 2012                 | Yes                | Yes                                      | No                    |
| <a href="#"><u>Interdisciplinary Neurosurgery: Advanced Techniques and Case Management</u></a> | Elsevier                                                                                                                      | 2014                 | Yes                | No                                       | No                    |
| <a href="#"><u>International Journal of Advances in Case Reports</u></a>                       | McMed International                                                                                                           | 2014                 | Yes                | Yes                                      | No                    |
| <a href="#"><u>International Journal of Case Reports and Images</u></a>                        | Edorium Journals                                                                                                              | 2010                 | Yes                | No                                       | No                    |
| <a href="#"><u>International Journal of Case Reports in Medicine</u></a>                       | IBIMA Publishing                                                                                                              | 2012                 | Yes                | Yes                                      | No                    |
| <a href="#"><u>International Journal of Case Studies</u></a>                                   | unclear                                                                                                                       | 2012                 | Yes                | Yes                                      | No                    |
| <a href="#"><u>International Journal of Clinical Case Reports</u></a>                          | BioPublisher                                                                                                                  | 2011                 | Yes                | Yes                                      | No                    |
| <a href="#"><u>International Journal of Clinical Case Studies</u></a>                          | Graphy Publications                                                                                                           | 2014                 | Yes                | Yes                                      | No                    |
| <a href="#"><u>International Journal of Clinical Cases and Investigations</u></a>              | unclear                                                                                                                       | 2010                 | Yes                | Yes                                      | No                    |
| <a href="#"><u>International Journal of Medical and Pharmaceutical Case Reports</u></a>        | ScienceDomain International                                                                                                   | 2014                 | Yes                | Yes                                      | No                    |
| <a href="#"><u>International Journal of Surgery Case Reports</u></a>                           | Elsevier                                                                                                                      | 2010                 | Yes                | No                                       | Yes                   |

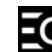

| <b>Journal title</b>                                                                   | <b>Publisher/Society</b>                                                                                              | <b>Year launched</b> | <b>Open access</b> | <b>Questionable publishing practices</b> | <b>PubMed indexed</b> |
|----------------------------------------------------------------------------------------|-----------------------------------------------------------------------------------------------------------------------|----------------------|--------------------|------------------------------------------|-----------------------|
| <a href="#"><i>International Medical Case Reports Journal</i></a>                      | Dove Medical Press                                                                                                    | 2008                 | Yes                | No                                       | Yes                   |
| <a href="#"><i>JAAD Case Reports</i></a>                                               | Elsevier/American Academy of Dermatology                                                                              | 2015                 | Yes                | No                                       | No                    |
| <a href="#"><i>Jacobs Journal of Clinical Case Reports</i></a>                         | Jacobs Publishers                                                                                                     | 2015                 | Yes                | Yes                                      | No                    |
| <a href="#"><i>JBJS Case Connector</i></a>                                             | STRIATUS Orthopaedic Communications                                                                                   | 2011                 | No                 | No                                       | No                    |
| <a href="#"><i>JCRS Online Case Reports</i></a>                                        | Elsevier/American Society of Cataract and Refractive Surgery and European Society of Cataract and Refractive Surgeons | 2013                 | Yes                | No                                       | No                    |
| <a href="#"><i>JMM Case Reports</i></a>                                                | Microbiology Society                                                                                                  | 2014                 | Yes                | No                                       | No                    |
| <a href="#"><i>Joseph Journal of Clinical Studies and Medical Case Reports</i></a>     | Joseph Publishing Group                                                                                               | 2015                 | Yes                | Yes                                      | No                    |
| <a href="#"><i>Journal of Anaesthesia &amp; Critical Care Case Reports</i></a>         | International Academic Research Group                                                                                 | 2015                 | Yes                | Yes                                      | No                    |
| <a href="#"><i>Journal of Cardiology Cases</i></a>                                     | Elsevier/Japanese College of Cardiology                                                                               | 2010                 | No                 | No                                       | No                    |
| <a href="#"><i>Journal of Case Reports</i></a>                                         | unclear                                                                                                               | 2011                 | Yes                | Yes                                      | No                    |
| <a href="#"><i>Journal of Case Reports and Clinical Research Studies</i></a>           | VRJ Publishers                                                                                                        | 2014                 | Yes                | Yes                                      | No                    |
| <a href="#"><i>Journal of Case Reports and Images in Medicine</i></a>                  | Edorium Journals                                                                                                      | 2015                 | Yes                | No                                       | No                    |
| <a href="#"><i>Journal of Case Reports and Images in Obstetrics and Gynecology</i></a> | Edorium Journals                                                                                                      | 2015                 | Yes                | No                                       | No                    |
| <a href="#"><i>Journal of Case Reports and Images in Oncology</i></a>                  | Edorium Journals                                                                                                      | 2015                 | Yes                | No                                       | No                    |
| <a href="#"><i>Journal of Case Reports and Images in Pathology</i></a>                 | Edorium Journals                                                                                                      | 2015                 | Yes                | No                                       | No                    |
| <a href="#"><i>Journal of Case Reports and Images in Surgery</i></a>                   | Edorium Journals                                                                                                      | 2015                 | Yes                | No                                       | No                    |
| <a href="#"><i>Journal of Case Reports and Studies</i></a>                             | Annex Publishers                                                                                                      | 2013                 | Yes                | Yes                                      | No                    |
| <a href="#"><i>Journal of Case Reports in Medicine</i></a>                             | Ashdin Publishing                                                                                                     | 2012                 | Yes                | Yes                                      | No                    |

| <b>Journal title</b>                                                                    | <b>Publisher/Society</b>                                                      | <b>Year launched</b> | <b>Open access</b> | <b>Questionable publishing practices</b> | <b>PubMed indexed</b> |
|-----------------------------------------------------------------------------------------|-------------------------------------------------------------------------------|----------------------|--------------------|------------------------------------------|-----------------------|
| <a href="#"><i>Journal of Case Reports in Oncology and Therapy</i></a>                  | EJourPub                                                                      | 2015                 | Yes                | Yes                                      | No                    |
| <a href="#"><i>Journal of Case Reports in Practice</i></a>                              | Saman Publishing                                                              | 2013                 | Yes                | Yes                                      | No                    |
| <a href="#"><i>Journal of Clinical &amp; Medical Case Reports</i></a>                   | Avens Publishing Group                                                        | 2013                 | Yes                | Yes                                      | No                    |
| <a href="#"><i>Journal of Clinical and Translational Endocrinology Case Reports</i></a> | Elsevier                                                                      | 2015                 | Yes                | No                                       | No                    |
| <a href="#"><i>Journal of Clinical Case Reports</i></a>                                 | OMICS International                                                           | 2011                 | Yes                | Yes                                      | No                    |
| <a href="#"><i>Journal of Clinical Studies &amp; Medical Case Reports</i></a>           | Herald Scholarly Open Access                                                  | 2014                 | Yes                | Yes                                      | No                    |
| <a href="#"><i>Journal of Dermatological Case Reports</i></a>                           | Spejaliści Dermatodzy                                                         | 2007                 | No                 | No                                       | Yes                   |
| <a href="#"><i>Journal of Investigative Medicine High Impact Case Reports</i></a>       | SAGE Publications                                                             | 2013                 | Yes                | No                                       | No                    |
| <a href="#"><i>Journal of Knee Surgery Reports</i></a>                                  | Thieme Medical Publishers                                                     | 2013                 | Yes                | No                                       | No                    |
| <a href="#"><i>Journal of Medical Case Reports</i></a>                                  | BioMed Central                                                                | 2007                 | Yes                | No                                       | Yes                   |
| <a href="#"><i>Journal of Medical Cases</i></a>                                         | Elmer Press                                                                   | 2010                 | Yes                | Yes                                      | No                    |
| <a href="#"><i>Journal of Neurological Surgery Reports</i></a>                          | Thieme Medical Publishers                                                     | 2012                 | Yes                | No                                       | Yes                   |
| <a href="#"><i>Journal of Orthopaedic Case Reports</i></a>                              | Indian Orthopaedic Research Group                                             | 2011                 | Yes                | No                                       | No                    |
| <a href="#"><i>Journal of Pediatric Surgery Case Reports</i></a>                        | Elsevier                                                                      | 2013                 | Yes                | No                                       | No                    |
| <a href="#"><i>Journal of Radiology Case Reports</i></a>                                | EduRad Publishing                                                             | 2008                 | Yes                | No                                       | Yes                   |
| <a href="#"><i>Journal of Surgical Case Reports</i></a>                                 | Oxford University Press                                                       | 2010                 | Yes                | No                                       | Yes                   |
| <a href="#"><i>Journal of Surgical Technique and Case Report</i></a>                    | Wolters Kluwer Health                                                         | 2014                 | Yes                | No                                       | Yes                   |
| <a href="#"><i>Journal of Vascular Surgery Cases</i></a>                                | Elsevier/Society for Vascular Surgery                                         | 2015                 | Yes                | No                                       | No                    |
| <a href="#"><i>JPRAS Open</i></a>                                                       | Elsevier/British Association of Plastic Reconstructive and Aesthetic Surgeons | 2015                 | Yes                | No                                       | No                    |
| <a href="#"><i>JSM Clinical Case Reports</i></a>                                        | JSciMed Central                                                               | 2013                 | Yes                | Yes                                      | No                    |
| <a href="#"><i>Medical Case Studies</i></a>                                             | Academic Journals                                                             | 2010                 | Yes                | Yes                                      | No                    |
| <a href="#"><i>Medical Mycology Case Reports</i></a>                                    | Elsevier/International Society for Human and Animal Mycology                  | 2012                 | Yes                | No                                       | Yes                   |
| <a href="#"><i>MOJ Clinical and Medical Case Reports</i></a>                            | MedCrave                                                                      | 2015                 | Yes                | Yes                                      | No                    |



| <b>Journal title</b>                                                      | <b>Publisher/Society</b>                             | <b>Year launched</b> | <b>Open access</b> | <b>Questionable publishing practices</b> | <b>PubMed indexed</b> |
|---------------------------------------------------------------------------|------------------------------------------------------|----------------------|--------------------|------------------------------------------|-----------------------|
| <a href="#"><i>Neurocase</i></a>                                          | Taylor & Francis                                     | 1995                 | Optional           | No                                       | Yes                   |
| <a href="#"><i>NMC Case Report Journal</i></a>                            | Japan Neurosurgical Society                          | 2014                 | Yes                | No                                       | No                    |
| <a href="#"><i>OA Case Reports</i></a>                                    | OA Publishing London                                 | 2012                 | Yes                | Yes                                      | No                    |
| <a href="#"><i>Oncology &amp; Cancer Case Reports</i></a>                 | OMICS International                                  | 2015                 | Yes                | Yes                                      | No                    |
| <a href="#"><i>Open Journal of Clinical and Medical Case Reports</i></a>  | unclear                                              | 2015                 | Yes                | Yes                                      | No                    |
| <a href="#"><i>Oral and Maxillofacial Surgery Cases</i></a>               | Elsevier                                             | 2015                 | Yes                | No                                       | No                    |
| <a href="#"><i>Oxford Medical Case Reports</i></a>                        | Oxford University Press                              | 2014                 | Yes                | No                                       | Yes                   |
| <a href="#"><i>Pathology Case Reviews</i></a>                             | Wolters Kluwer Health                                | 1996                 | No                 | No                                       | No                    |
| <a href="#"><i>Pediatric Urology Case Reports</i></a>                     | Hayrettin Ozturk                                     | 2014                 | Yes                | No                                       | No                    |
| <a href="#"><i>Radiology Case Reports</i></a>                             | Elsevier/University of Washington                    | 2006                 | Yes                | No                                       | No                    |
| <a href="#"><i>Respiratory Medicine Case Reports</i></a>                  | Elsevier                                             | 2008                 | Yes                | No                                       | Yes                   |
| <a href="#"><i>Respirology Case Reports</i></a>                           | Wiley/Asian Pacific Society of Respirology           | 2013                 | Yes                | No                                       | Yes                   |
| <a href="#"><i>Retinal Cases and Brief Reports</i></a>                    | Wolters Kluwer Health                                | 2007                 | Optional           | No                                       | Yes                   |
| <a href="#"><i>SAGE Open Medical Case Reports</i></a>                     | SAGE Publications                                    | 2013                 | Yes                | No                                       | Yes                   |
| <a href="#"><i>Scholarena Journal of Case Reports</i></a>                 | Scholarena                                           | 2014                 | Yes                | Yes                                      | No                    |
| <a href="#"><i>Scholars Journal of Medical Case Reports</i></a>           | SAS Publishers                                       | 2013                 | Yes                | Yes                                      | No                    |
| <a href="#"><i>Southeast Asian Journal of Case Report and Review</i></a>  | Sageya Publishing                                    | 2012                 | Yes                | Yes                                      | No                    |
| <a href="#"><i>Surgical Case Reports</i></a>                              | Springer/Japan Surgical Society                      | 2015                 | Yes                | No                                       | No                    |
| <a href="#"><i>The Thoracic and Cardiovascular Surgeon Reports</i></a>    | Thieme Medical Publishers                            | 2014                 | Yes                | No                                       | Yes                   |
| <a href="#"><i>Translational Medicine Case Reports</i></a>                | Elsevier/European Society for Translational Medicine | 2015                 | Yes                | No                                       | No                    |
| <a href="#"><i>Trauma Case Reports</i></a>                                | Elsevier                                             | 2015                 | Yes                | No                                       | No                    |
| <a href="#"><i>Urology Case Reports</i></a>                               | Elsevier                                             | 2013                 | Yes                | No                                       | No                    |
| <a href="#"><i>World Journal of Clinical Cases</i></a>                    | Baishideng Publishing Group                          | 2013                 | Yes                | Yes                                      | Yes                   |
| <a href="#"><i>World Journal of Medical and Surgical Case Reports</i></a> | Narain Publishers                                    | 2012                 | Yes                | Yes                                      | No                    |
